# Supplementary material
Source: publisher figshare collection journal article supplement (https://gsajournals.figshare.com/ndownloader/files/21823230)
Supplement: Supplementary file 1 [file 21823230]

**Figure S1**

LD statistics across distances.For each autosome, 1000 genotyped SNPs were sampled from the UK Biobank cohort used for analysis (N ~ 259,000). For each sampled SNP *j*, squared genotype correlations were computed between SNP *j* and SNP *j*+1, SNP *j* and SNP *j*+2…SNP *j* and SNP *j*+250.
